# Supplementary material
Source: publisher figshare collection journal article supplement (https://acs.figshare.com/ndownloader/files/3789070)
Supplement: Supplementary file 1 [file 3789070]

# **Low Temperature Fabrication of Mesoporous Titanium Dioxide Thin Films with Tunable Refractive Index for 1-D Photonic Crystals and Sensors on Rigid and Flexible Substrates**

Cheng Li †, Nicholas S. Colella †, James J. Watkins †\*

†Department of Polymer Science and Engineering, University of Massachusetts Amherst, 120 Governors Drive, Amherst, Massachusetts 01003, United States

\*E-mail: watkins@polysci.umass.edu

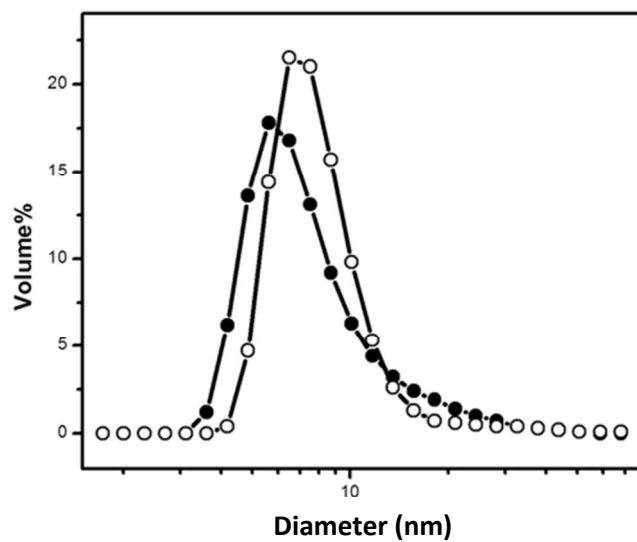

Figure.S1 Size distribution of TiO<sub>2</sub> nanoparticles in water (white circle) and NMP/MeOH (black circle)

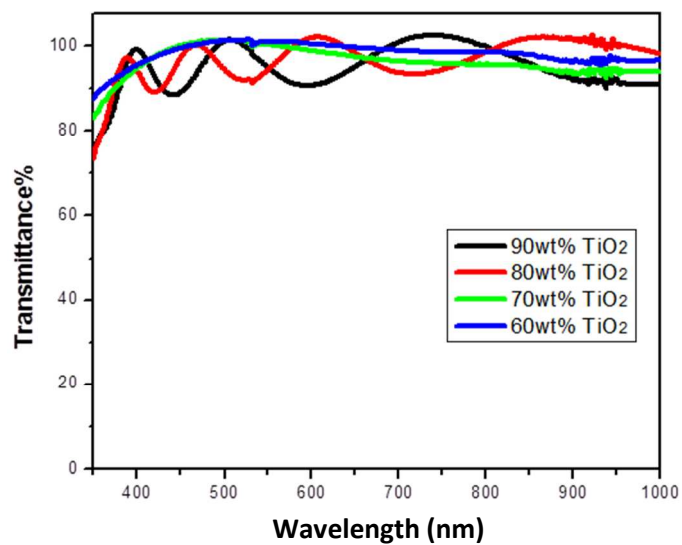

Figure.S2 UV-Vis spectrum of TiO<sub>2</sub>/NOA65 hybrid films

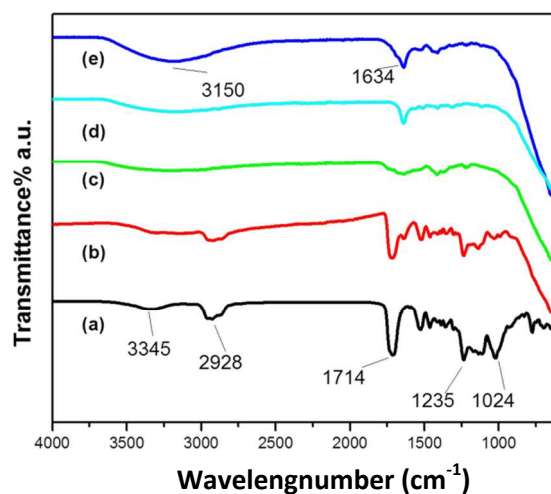

Figure.S3 FTIR spectrum of NOA65(a), 60wt%TiO<sub>2</sub>/40wt%NOA65(b), 60wt%TiO<sub>2</sub>/40wt%NOA65 after UV radiation at room temperature for three hours(c), 60wt%TiO<sub>2</sub>/40wt%NOA65 after sufficient UV radiation at 65 °C for one hour(d) TiO<sub>2</sub> nanoparticles(e).

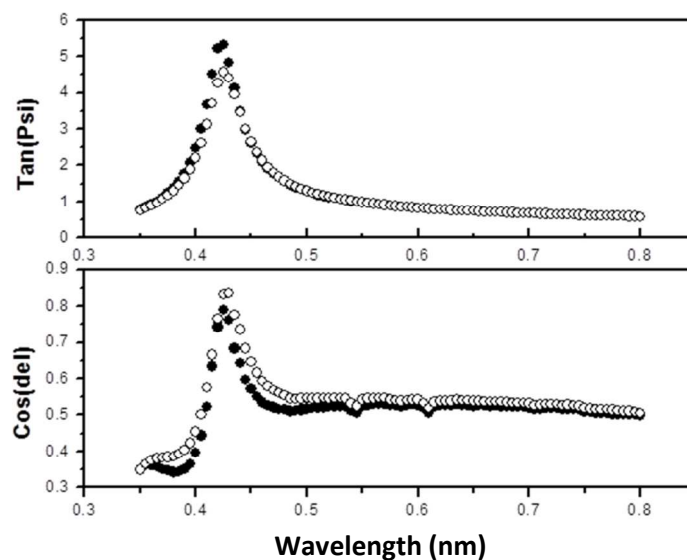

(a)

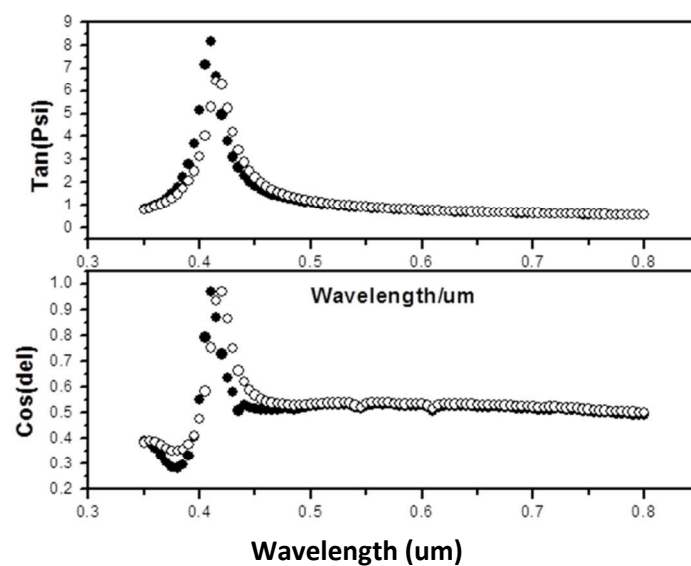

(b)

Figure.S4 Ellipsometry data of T60 films before(black solid) and after(black circle) treating with heating(a) and ultra-sonication in water(b) .

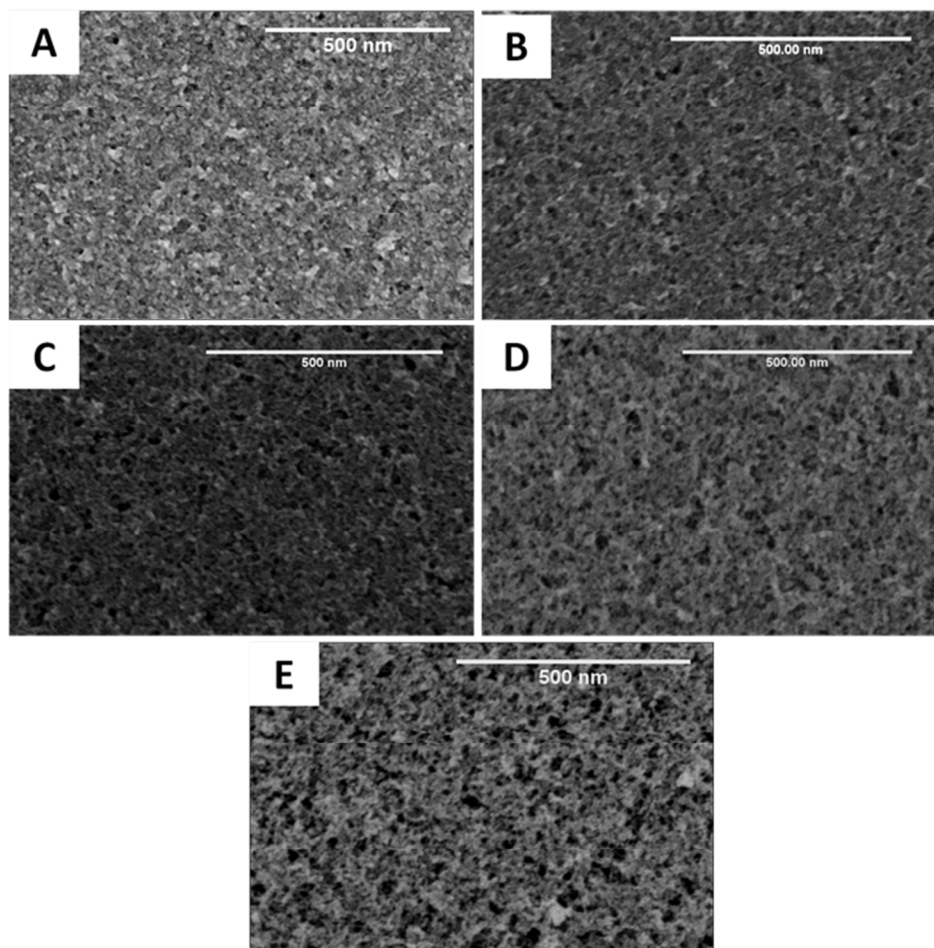

Figure.S5 SEM image of T100(a), T90(b), T70(c), T60(d), T50(e)

Table.S1 Thickness and refractive index at 600nm of T60 samples before and after heating and sonication treatment in different solvents

|          | Thickness as casting | Thickness after treatment | Refractive index as casting | Refractive index after treatment |
|----------|----------------------|---------------------------|-----------------------------|----------------------------------|
| Heating  | 80.2nm               | 81.0nm                    | 1.54                        | 1.54                             |
| Water    | 79.6nm               | 78.8nm                    | 1.53                        | 1.54                             |
| NMP/MeOH | 82.3nm               | 82.6nm                    | 1.54                        | 1.54                             |
| IPA      | 80.7nm               | 80.1nm                    | 1.53                        | 1.54                             |
| DMF      | 72.0nm               | 72.9nm                    | 1.54                        | 1.54                             |

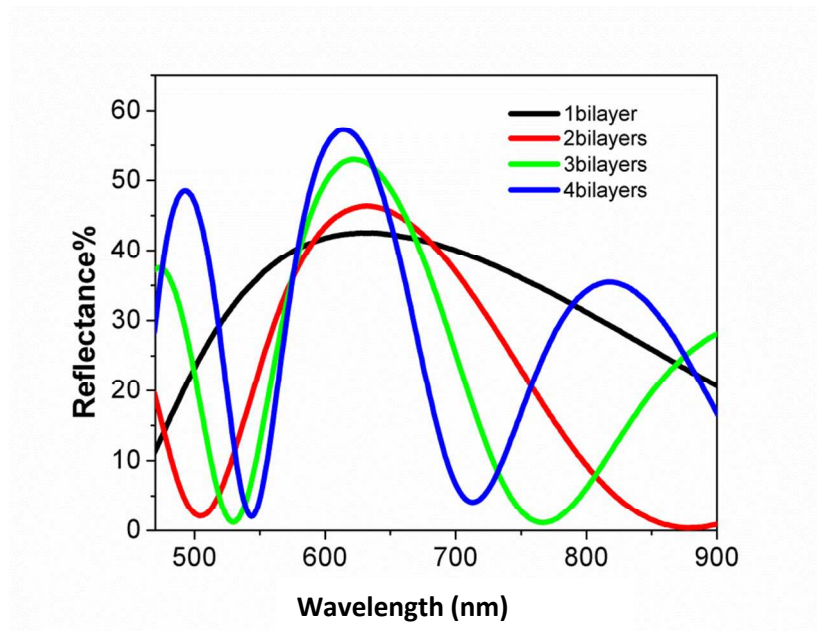

Figure S6 Reflectance measurement of a Bragg mirror sample with different layer number

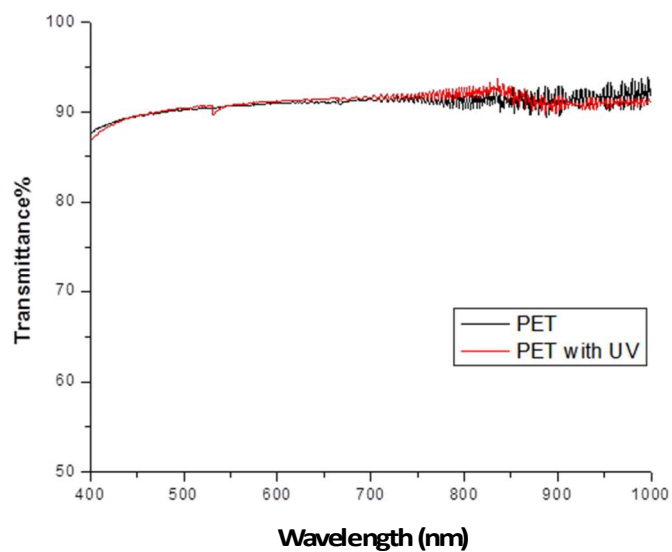

Figure.S7 UV-Vis of PET substrate and UV exposed PET substrate

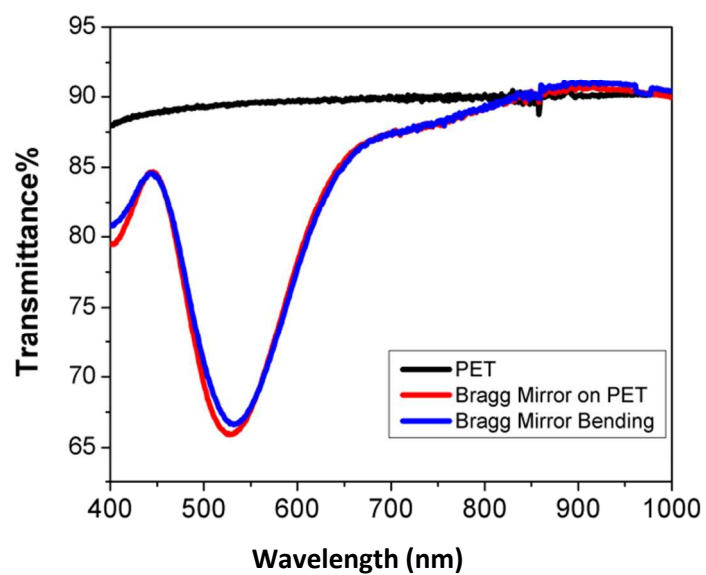

Figure.S8 Transmittance of a mesoporous  $\text{TiO}_2$  Bragg mirror on PET before and after bending for 100 times.

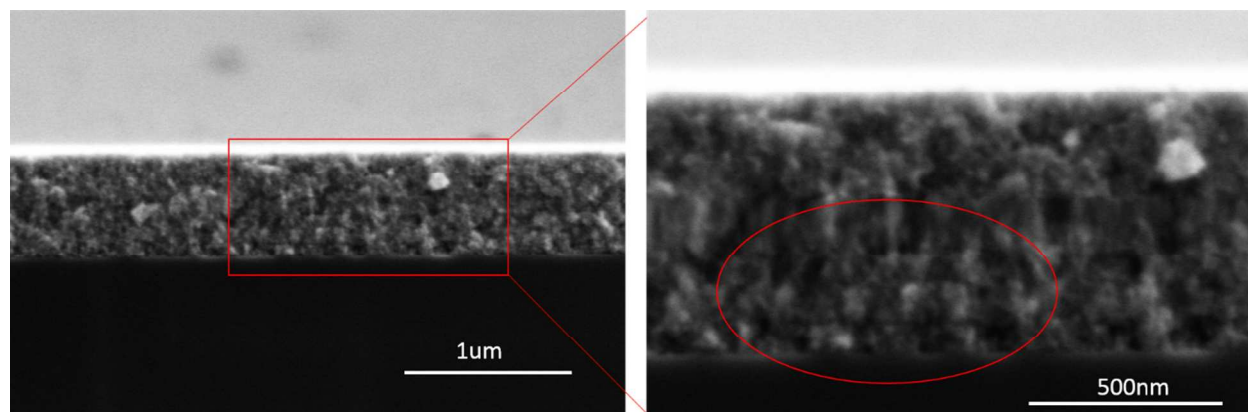

Figure S9. SEM image of a mesoporous  $\text{TiO}_2$  Bragg mirror on PET substrate. Sample was coated with gold to increase conductivity.
